# Supplementary material for: Synthesis of 1,1′-diaryl-4,4′-bibenzo[c]thiophene derivatives with aryl substituents on the thiophene rings by Stille or Suzuki coupling reaction
Source: Royal Society of Chemistry journal article supplement (doi:10.1039/d3nj01299a), 2023-01-01
Supplement: d3nj01299a1.pdf [file d3nj01299a1.pdf]

## Supplementary Information

### Synthesis of 1,1'-diaryl-4,4'-bibenzo[*c*]thiophene derivatives with aryl substituents on the thiophene rings by Stille or Suzuki coupling reaction

Taiki Higashino,<sup>a</sup> Yasuto Hara,<sup>a</sup> Keiichi Imato,<sup>a</sup> Seiji Akiyama,<sup>b</sup> Mio Ishida<sup>b</sup> and  
Yousuke Ooyama<sup>\*a</sup>

<sup>a</sup>*Department of Applied Chemistry, Graduate School of Engineering, Hiroshima University, 1-4-1 Kagamiyama, Higashi-Hiroshima 739-8527, Japan. E-mail: yooyama@hiroshima-u.ac.jp; Fax: (+81) 82-424-5494*

<sup>b</sup>*Science & Innovation Center, Mitsubishi Chemical Corporation, 1000 Kamoshida-cho, Aoba-ku, Yokohama-shi, Kanagawa 227-8502, Japan*

## General

Melting points were measured with an AS ONE ATM-02. IR spectra were recorded on a SHIMADZU IRTracer-100 by ATR method.  $^1\text{H}$  NMR and  $^{13}\text{C}$  NMR spectra were recorded on a Varian-400 or -500 FT NMR spectrometer. High-resolution mass spectral data by APCI was acquired on a Thermo Fisher Scientific LTQ Orbitrap XL. Recycling gel permeation chromatography (GPC) was performed using a RI-detector (SHIMADZU RID-20A), an UV-detector (SHIMADZU SPD-20A), and a pump (SHIMADZU LC-20A) with two columns (Shodex GPC FP-2002). Photoabsorption spectra of solutions were observed with a Shimadzu UV-3600 plus spectrophotometer. Photoabsorption spectra of solids were recorded by a Shimadzu UV-3600 plus spectrophotometer with a calibrated integrating sphere system. Fluorescence spectra of solutions and solids were measured with a HORIBA FluoroMax-4 spectrofluorometer. The fluorescence quantum yields in solution and in solid state were determined using a HORIBA FluoroMax-4 spectrofluorometer with a calibrated integrating sphere system. Fluorescence decay measurements were performed on a HORIBA DeltaFlex modular fluorescence lifetime system, using a Nano LED pulsed diode excitation source (370 nm). Cyclic voltammetry (CV) curves were recorded in acetonitrile/ $\text{Bu}_4\text{NClO}_4$  (0.1 M) or DMF/ $\text{Bu}_4\text{NClO}_4$  (0.1 M) solution with a three-electrode system consisting of  $\text{Ag}/\text{Ag}^+$  ( $\text{AgNO}_3$  in acetonitrile/ $\text{Bu}_4\text{NClO}_4$  or DMF/ $\text{Bu}_4\text{NClO}_4$ ) as the reference electrode, a Pt plate as the working electrode and a Pt wire as the counter electrode using an Electrochemical Measurement System HZ-7000 (HOKUTO DENKO). Powder X-ray diffraction measurements were performed on a Rigaku MiniFlex600-C/CM diffractometer with Cu  $\text{K}\alpha$  radiator. Differential scanning calorimetry was carried out using a Shimadzu DSC-60.

## Synthesis

**1,1'-dibromo-4,4'-bibenzo[*c*]thiophene (1,1'-Br-4,4'-BBT).** To a THF solution (1.2 mL) of **H4-4,4'-BBT-SO** (0.05 g, 0.17 mmol) under a nitrogen atmosphere at  $-78\text{ }^\circ\text{C}$  was added tetramethylethylenediamine (0.15 mL, 0.99 mmol). After stirring for 10 min, a 1.6 M hexane solution of *n*BuLi (0.62 mL, 0.99 mmol) was added dropwise. After stirring for 10 min at room temperature, the reaction mixture was cooled to  $-78\text{ }^\circ\text{C}$ , and then, a THF solution (4.0 mL) of tetrabromomethane (0.06 g, 0.83 mmol) was added dropwise. After stirring for 2 h at room temperature, the reaction mixture was quenched with water, and then, the solution was extracted with dichloromethane. The dichloromethane extract was dried over anhydrous  $\text{MgSO}_4$ , filtrated and concentrated. Recycling GPC (chloroform as eluent) for the residue was performed to give **1,1'-Br-4,4'-BBT** (0.016 g, yield 23 %) as a dark-yellow solid; decomposed at around  $60\text{ }^\circ\text{C}$ ; FT-IR (ATR):  $\tilde{\nu} = 3107, 3057, 1593, 1344, 1301, 1188\text{ cm}^{-1}$ ;  $^1\text{H}$  NMR (500 MHz, acetone- $d_6$ ):  $\delta = 7.26$  (d,  $J = 6.5\text{ Hz}$ , 2H), 7.34–7.38 (m, 2H), 7.57 (dt, 2H), 7.74 (s, 2H) ppm; It was difficult to obtain the  $^{13}\text{C}$  NMR spectrum due to the thermal instability of **1,1'-Br-4,4'-BBT** in any deuterated solvents; HRMS (APCI):  $m/z$  (%):  $[\text{M}+\text{H}^+]$  calcd. for  $\text{C}_{16}\text{H}_9\text{Br}_2\text{S}_2$ , 422.85069; found 422.85135.

**1,1'-Bis(4-(*tert*-butyl)phenyl)-4,4'-bibenzo[*c*]thiophene (1,1'-Ph*t*Bu-4,4'-BBT).** (Method A: previous work)<sup>1</sup> A solution of **1,1'-Sn-4,4'-BBT** (0.20 g, 0.34 mmol), 1-bromo-4-*tert*-butylbenzene (0.12 g, 1.02 mmol), and  $\text{Pd}(\text{PPh}_3)_4$  (0.02 g, 0.02 mmol) in toluene (2.0 mL) was stirred for 21 h at  $110\text{ }^\circ\text{C}$  under a nitrogen atmosphere. After concentrating under reduced pressure, the resulting residue was dissolved in

dichloromethane and washed with water. The dichloromethane extract was dried over anhydrous MgSO<sub>4</sub>, filtrated and concentrated. Recycling GPC (toluene as eluent) for the residue was performed to give **1,1'-PhzBu-4,4'-BBT** (0.08 g, yield 44 %) as a yellow solid. (Method B) A solution of **1,1'-Br-4,4'-BBT** (0.030 g, 0.071 mmol), 4-*tert*-butylphenylboronic acid (0.038 g, 0.212 mmol), Pd(PPh<sub>3</sub>)<sub>4</sub> (0.008 g, 0.007 mmol), and Na<sub>2</sub>CO<sub>3</sub> aq. (1.0 mL, 0.707 mmol) in a mixture of toluene (1.0 mL) and ethanol (1.5 mL) was stirred for 21 h at room temperature under a nitrogen atmosphere. After concentrating under reduced pressure, the resulting residue was dissolved in dichloromethane and washed with water. The dichloromethane extract was dried over anhydrous MgSO<sub>4</sub>, filtrated and concentrated. Recycling GPC (chloroform as eluent) for the residue was performed to give **1,1'-PhzBu-4,4'-BBT** (0.012 g, yield 32 %) as a yellow solid; m.p. 202–205 °C; FT-IR (ATR):  $\tilde{\nu}$  = 3103, 2953, 2900, 2664, 1862, 1512, 1359 cm<sup>-1</sup>; <sup>1</sup>H NMR (500 MHz, acetone-*d*<sub>6</sub>):  $\delta$  = 1.41 (s, 18H, Ph-C(CH<sub>3</sub>)<sub>3</sub>), 7.26–7.30 (m, 4H, CH at 5,5',6,6'-positions on Ph-Ph), 7.62–7.66 (m, 6H, CH at 3,3'-positions on Th and CH at 3,5'-positions on *t*BuPh), 7.69–7.71 (m, 4H, CH at 2,6'-positions on *t*BuPh), 7.90–7.95 (m, 2H, CH at 7,7'-positions on Ph-Ph) ppm; <sup>13</sup>C NMR (125 MHz, acetone-*d*<sub>6</sub>):  $\delta$  = 31.61, 35.27, 117.06, 121.28, 124.76, 125.14, 127.05, 129.68, 132.50, 134.90, 135.32, 136.09, 139.97, 151.57 ppm; HRMS (APCI): *m/z* (%): [M+H<sup>+</sup>] calcd. for C<sub>36</sub>H<sub>35</sub>S<sub>2</sub>, 531.21747; found 531.21893.

**1,1'-Bis(4-cyanophenyl)-4,4'-bibenzo[*c*]thiophene (1,1'-PhCN-4,4'-BBT)**. (Method A) A solution of **1,1'-Sn-4,4'-BBT** (0.087 g, 0.147 mmol), 4-bromobenzonitrile (0.080 g, 0.441 mmol), and Pd(PPh<sub>3</sub>)<sub>4</sub> (0.008 g, 0.007 mmol) in toluene (9.0 mL) was stirred for 26 h at 110 °C under a nitrogen atmosphere. After concentrating under reduced pressure, the resulting residue was dissolved in dichloromethane and washed with water. The dichloromethane extract was dried over anhydrous MgSO<sub>4</sub>, filtrated and concentrated. The residue was chromatographed on silica gel (dichloromethane : hexane = 1 : 1 as eluent) to give **1,1'-PhCN-4,4'-BBT** (0.034 g, yield 49 %) as a yellow solid. (Method B) A solution of **1,1'-Br-4,4'-BBT** (0.031 g, 0.073 mmol), 4-cyanophenylboronic acid (0.032 g, 0.219 mmol), Pd(PPh<sub>3</sub>)<sub>4</sub> (0.008 g, 0.007 mmol), and Na<sub>2</sub>CO<sub>3</sub> aq. (1.0 mL, 0.730 mmol) in a mixture of toluene (1.0 mL) and ethanol (1.5 mL) was stirred for 25 h at room temperature under a nitrogen atmosphere. After concentrating under reduced pressure, the resulting residue was dissolved in dichloromethane and washed with water. The dichloromethane extract was dried over anhydrous MgSO<sub>4</sub>, filtrated and concentrated. The residue was chromatographed on silica gel (dichloromethane : hexane = 1 : 1 as eluent) to give **1,1'-PhCN-4,4'-BBT** (0.006 g, yield 18 %) as a yellow solid; decomposed at around 245 °C; FT-IR (ATR):  $\tilde{\nu}$  = 2222, 1601, 1510, 1176 cm<sup>-1</sup>; <sup>1</sup>H NMR (400 MHz, dichloromethane-*d*<sub>2</sub>):  $\delta$  = 7.26–7.30 (dd, *J* = 1.2 and 6.6 Hz, 2H, CH at 5,5'-positions on Ph-Ph), 7.31–7.35 (m, 2H, CH at 6,6'-positions on Ph-Ph), 7.67 (s, 2H, CH at 3,3'-positions on Th), 7.81 (d, *J* = 8.7 Hz, 4H, CH at 3,5'-positions on CNPh), 7.85 (d, *J* = 8.6 Hz, 4H, CH at 2,6'-positions on CNPh), 7.91–7.94 (dt, 2H, CH at 7,7'-positions on Ph-Ph) ppm; It was difficult to obtain the <sup>13</sup>C NMR spectrum due to the low solubility of **1,1'-PhCN-4,4'-BBT** in any deuterated solvents; HRMS (APCI): *m/z* (%): [M+H<sup>+</sup>] calcd. for C<sub>30</sub>H<sub>17</sub>N<sub>2</sub>S<sub>2</sub>, 469.08277; found 469.08282.

Ref. 1: K. Obayashi, S. Miho, M. Yasui, K. Imato, S. Akiyama, M. Ishida, and Y. Ooyama, *New J. Chem.*, 2021, **45**, 17085–17094.

**X-ray crystallographic analysis:** The reflection data of **1,1'-PhzBu-4,4'-BBT** were collected at 100 K on a Rigaku XtaLAB Synergy-R/DW diffractometer using monochromated Mo-K $\alpha$  ( $\lambda = 0.71073 \text{ \AA}$ ). The structure was solved by the SHELXT 2014/5 method and refined based on full-matrix least squares on  $F^2$  using SHELXL-2018/3. The non-hydrogen atoms were refined anisotropically. Hydrogen atoms were fixed geometrically and not refined. Crystallographic data have been deposited in the Cambridge Crystallographic Data Centre (CCDC 2248179).

**Crystal of 1,1'-PhzBu-4,4'-BBT:** A suitable crystal of **1,1'-PhzBu-4,4'-BBT** was recrystallized from acetone as yellow plate crystal, air stable. Crystallographic data:  $C_{36}H_{34}S_2$ ,  $M = 530.75$ , monoclinic,  $a = 10.3004(2)$ ,  $b = 11.6368(3)$ ,  $c = 47.0635(14) \text{ \AA}$ ,  $\beta = 92.625(3)^\circ$ ,  $V = 5635.3(3) \text{ \AA}^3$ ,  $D_{\text{calcd}} = 1.251 \text{ g cm}^{-3}$ , space group  $P2_1/n$  (no.14),  $Z = 8$ , 14483 reflections measured, 10317 unique ( $R_{\text{int}} = 0.0726$ ), which were used in all calculations. The final  $R_1(\text{reflections}) = 0.0664$  (7324) [ $I > 2\sigma(I)$ ],  $wR_2(\text{reflections}) = 0.1642$  (10317). GOF = 1.049.

**Table S1** Crystal data and structure refinement parameters for **1,1'-PhzBu-4,4'-BBT** (CCDC 2248179).

| Compound                                                                            | <b>1,1'-PhzBu-4,4'-BBT</b>                        |
|-------------------------------------------------------------------------------------|---------------------------------------------------|
| Molecular formula                                                                   | $C_{36}H_{34}S_2$                                 |
| Formula weight                                                                      | 530.75                                            |
| Number of reflection used for unit cell determination ( $2\theta$ range/ $^\circ$ ) | 51532 (3.606-50.7)                                |
| Temperature/K                                                                       | 100                                               |
| Crystal System                                                                      | monoclinic                                        |
| Space group                                                                         | $P2_1/n$                                          |
| $a/\text{\AA}$                                                                      | 10.3004(2)                                        |
| $b/\text{\AA}$                                                                      | 11.6368(3)                                        |
| $c/\text{\AA}$                                                                      | 47.0635(14)                                       |
| $\alpha/^\circ$                                                                     |                                                   |
| $\beta/^\circ$                                                                      | 92.625(3)                                         |
| $\gamma/^\circ$                                                                     |                                                   |
| $V/\text{\AA}^3$                                                                    | 5635.3(3)                                         |
| $Z$                                                                                 | 8                                                 |
| $D_c/\text{g cm}^{-3}$                                                              | 1.251                                             |
| $F(000)$                                                                            | 2256                                              |
| Radiation                                                                           | Mo-K $\alpha$ ( $\lambda = 0.71073 \text{ \AA}$ ) |
| Crystal size/ $\text{mm}^3$                                                         | 0.145 $\times$ 0.113 $\times$ 0.024               |
| Range of indices $h; k; l$                                                          | -12, 12; -14, 14; -56, 56                         |
| Reflections collected (unique)                                                      | 10317                                             |
| Reflection observed with $I_0 > 2\sigma I_0$                                        | 7324                                              |
| Number of parameters                                                                | 697                                               |
| Final R indexes [ $I_0 > 2\sigma I_0$ ]                                             | $R_1 = 0.0664$ , $wR_2 = 0.1488$                  |
| Final R indexes [all data]                                                          | $R_1 = 0.0994$ , $wR_2 = 0.1642$                  |
| Goodness-of-fit on $F^2$                                                            | 1.049                                             |
| Max. Shift/Error in final cycle                                                     | 0.00                                              |
| Max. peak in final diff. map/ $e \text{ \AA}^{-3}$                                  | 0.58                                              |
| Min. peak in final diff. map/ $e \text{ \AA}^{-3}$                                  | -0.48                                             |



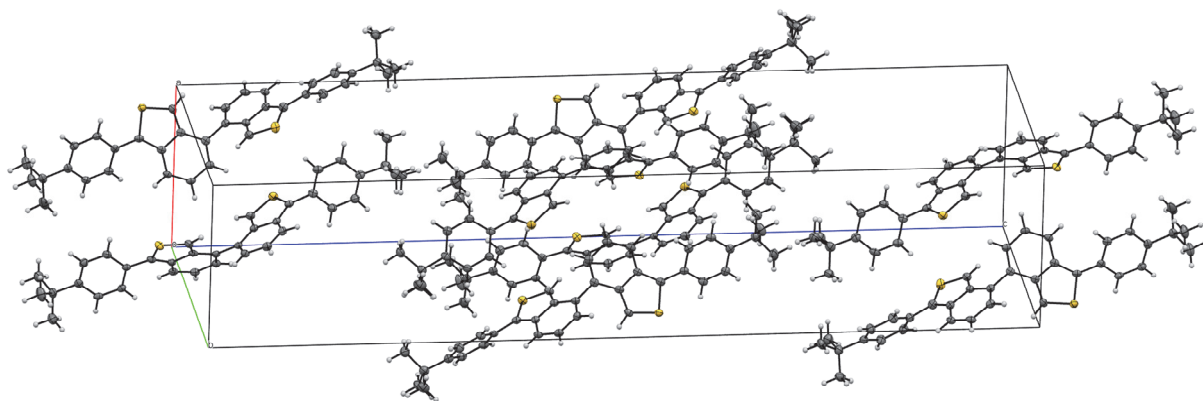

**Fig. S3** Crystal structure of **BBT-PhzBu**: molecular packing structure.

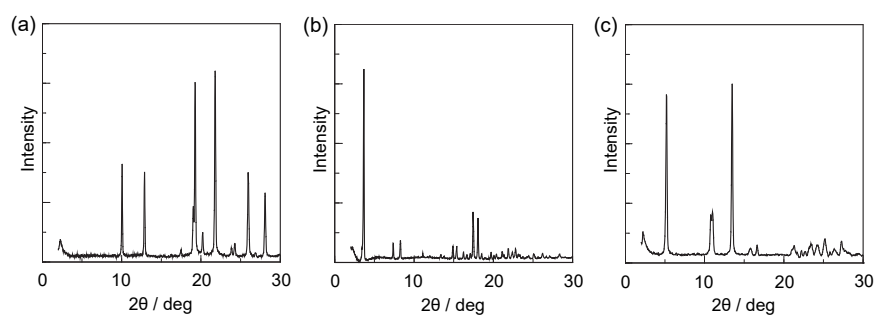

**Fig. S4** XRD patterns of (a) **BBT-H**, (b) **BBT-PhzBu**, and (c) **BBT-PhCN**.

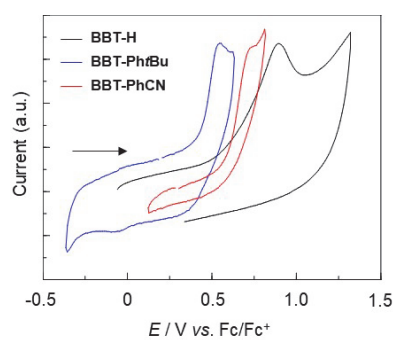

**Fig. S5** Cyclic voltammograms of **BBT-H** and **BBT-PhzBu** in acetonitrile containing 0.1 M  $\text{Bu}_4\text{NClO}_4$  and **BBT-PhCN** in DMF containing 0.1 M  $\text{Bu}_4\text{NClO}_4$  at a scan rate of  $100 \text{ mV s}^{-1}$ . The arrow denotes the direction of the potential scan

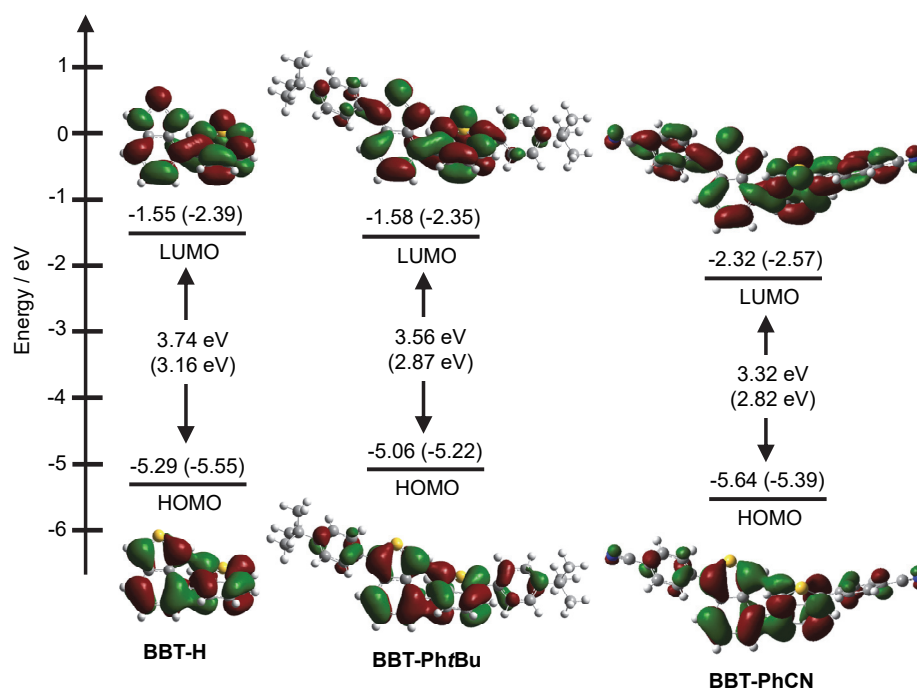

**Fig. S6** Energy level diagram, HOMO and LUMO of **BBT-H**, **BBT-PhtBu** and **BBT-PhCN** derived from DFT calculations at the B3LYP/6-31G(d,p) level. Numbers in parentheses are the experimental values.

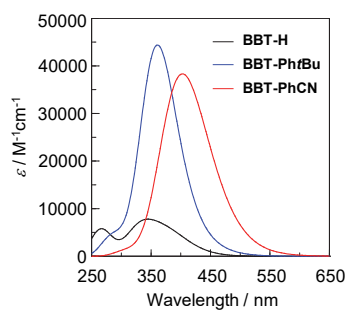

**Fig. S7** Photoabsorption spectra of **BBT-H**, **BBT-PhtBu** and **BBT-PhCN** derived from TD-DFT calculations.

**Table S2** Geometrical coordinates of the optimized **4,4'-BBT** by DFT at the B3LYP/6-31G(d,p) level.<sup>2</sup>

Cartesian coordinates:

| Center Number | Atomic Number | Atomic Type | Coordinates (Angstroms) |           |           |
|---------------|---------------|-------------|-------------------------|-----------|-----------|
|               |               |             | X                       | Y         | Z         |
| 1             | C             | 0           | 3.014613                | 0.092656  | 0.246587  |
| 2             | C             | 0           | 3.469568                | 1.192933  | 1.038642  |
| 3             | C             | 0           | 2.586725                | 2.181467  | 1.372708  |
| 4             | C             | 0           | 1.21901                 | 2.12832   | 0.956653  |
| 5             | C             | 0           | 0.713504                | 1.089175  | 0.210163  |
| 6             | C             | 0           | 1.622641                | 0.033794  | -0.17567  |
| 7             | S             | 0           | 2.781034                | -2.035549 | -1.172737 |
| 8             | C             | 0           | -1.622642               | 0.033794  | 0.17567   |
| 9             | C             | 0           | -0.713504               | 1.089175  | -0.210163 |
| 10            | C             | 0           | -1.21901                | 2.128319  | -0.956655 |
| 11            | C             | 0           | -2.586726               | 2.181466  | -1.372709 |
| 12            | C             | 0           | -3.469569               | 1.192933  | -1.038641 |
| 13            | C             | 0           | -3.014613               | 0.092656  | -0.246585 |
| 14            | S             | 0           | -2.781033               | -2.035551 | 1.172734  |
| 15            | H             | 0           | 4.506637                | 1.23322   | 1.358132  |
| 16            | H             | 0           | 2.916292                | 3.02579   | 1.971013  |
| 17            | H             | 0           | 0.549238                | 2.927872  | 1.258602  |
| 18            | H             | 0           | -0.549238               | 2.927871  | -1.258604 |
| 19            | H             | 0           | -2.916292               | 3.025789  | -1.971014 |
| 20            | H             | 0           | -4.506638               | 1.23322   | -1.35813  |
| 21            | C             | 0           | 3.751548                | -0.981598 | -0.225472 |
| 22            | H             | 0           | 4.800145                | -1.191301 | -0.070182 |
| 23            | C             | 0           | 1.369808                | -1.078593 | -0.963293 |
| 24            | H             | 0           | 0.437756                | -1.375725 | -1.419233 |
| 25            | C             | 0           | -1.369809               | -1.078591 | 0.963295  |
| 26            | H             | 0           | -0.437757               | -1.375723 | 1.419236  |
| 27            | C             | 0           | -3.751549               | -0.981596 | 0.225475  |
| 28            | H             | 0           | -4.800146               | -1.191299 | 0.070187  |



**Table S3** Geometrical coordinates of the optimized **1,1'-PhzBu-4,4'-BBT** by DFT at the B3LYP/6-31G(d,p) level.<sup>2</sup>

Cartesian coordinates:

| Center Number | Atomic Number | Atomic Type | Coordinates (Angstroms) |           |           |
|---------------|---------------|-------------|-------------------------|-----------|-----------|
|               |               |             | X                       | Y         | Z         |
| 1             | C             | 0           | 1.620738                | 1.023449  | -0.238209 |
| 2             | C             | 0           | 3.025876                | 1.083365  | 0.133791  |
| 3             | C             | 0           | 3.480829                | 2.153026  | 0.966515  |
| 4             | C             | 0           | 2.599335                | 3.125970  | 1.351629  |
| 5             | C             | 0           | 1.227636                | 3.087165  | 0.953848  |
| 6             | C             | 0           | 0.714470                | 2.062505  | 0.193584  |
| 7             | C             | 0           | 1.336319                | -0.081327 | -1.024700 |
| 8             | C             | 0           | 3.769099                | 0.014305  | -0.378440 |
| 9             | H             | 0           | 4.513994                | 2.178448  | 1.294241  |
| 10            | H             | 0           | 2.936109                | 3.941171  | 1.985304  |
| 11            | H             | 0           | 0.560206                | 3.875452  | 1.288908  |
| 12            | C             | 0           | -0.723119               | 2.057954  | -0.192642 |
| 13            | C             | 0           | -1.620980               | 1.009232  | 0.233300  |
| 14            | C             | 0           | -1.244761               | 3.083294  | -0.946208 |
| 15            | C             | 0           | -3.026897               | 1.060861  | -0.136954 |
| 16            | C             | 0           | -1.327522               | -0.098276 | 1.012655  |
| 17            | C             | 0           | -2.617111               | 3.114170  | -1.342468 |
| 18            | H             | 0           | -0.583701               | 3.878787  | -1.276837 |
| 19            | C             | 0           | -3.490857               | 2.132239  | -0.962509 |
| 20            | C             | 0           | -3.761439               | -0.016958 | 0.369271  |
| 21            | H             | 0           | -2.960676               | 3.930748  | -1.970701 |
| 22            | H             | 0           | -4.524518               | 2.151998  | -1.289170 |
| 23            | S             | 0           | 2.735530                | -1.032475 | -1.302779 |
| 24            | S             | 0           | -2.719378               | -1.061424 | 1.286306  |
| 25            | C             | 0           | -5.191529               | -0.323611 | 0.241465  |
| 26            | C             | 0           | -5.642122               | -1.634856 | 0.021131  |
| 27            | C             | 0           | -6.168773               | 0.683249  | 0.357653  |
| 28            | C             | 0           | -7.001455               | -1.925985 | -0.083290 |
| 29            | H             | 0           | -4.916929               | -2.436052 | -0.089229 |
| 30            | C             | 0           | -7.521328               | 0.384853  | 0.239351  |
| 31            | H             | 0           | -5.862729               | 1.701833  | 0.572165  |
| 32            | C             | 0           | -7.977949               | -0.925731 | 0.015913  |
| 33            | H             | 0           | -7.291094               | -2.955810 | -0.257229 |
| 34            | H             | 0           | -8.237111               | 1.195472  | 0.340234  |

|    |   |   |            |           |           |
|----|---|---|------------|-----------|-----------|
| 35 | C | 0 | 5.201196   | -0.282539 | -0.250771 |
| 36 | C | 0 | 6.170612   | 0.728347  | -0.353774 |
| 37 | C | 0 | 5.659903   | -1.596599 | -0.041115 |
| 38 | C | 0 | 7.529954   | 0.440675  | -0.233028 |
| 39 | H | 0 | 5.859547   | 1.747053  | -0.560373 |
| 40 | C | 0 | 7.017124   | -1.875039 | 0.064558  |
| 41 | H | 0 | 4.939188   | -2.403175 | 0.058676  |
| 42 | C | 0 | 7.991545   | -0.865298 | -0.021292 |
| 43 | H | 0 | 8.234102   | 1.259752  | -0.323341 |
| 44 | H | 0 | 7.320017   | -2.904717 | 0.230199  |
| 45 | C | 0 | -9.485922  | -1.207807 | -0.103694 |
| 46 | C | 0 | -10.194232 | -0.784326 | 1.205258  |
| 47 | C | 0 | -10.068685 | -0.397330 | -1.285873 |
| 48 | C | 0 | -9.783967  | -2.698677 | -0.350176 |
| 49 | H | 0 | -9.806257  | -1.347436 | 2.060215  |
| 50 | H | 0 | -10.056906 | 0.280065  | 1.417014  |
| 51 | H | 0 | -11.271276 | -0.973248 | 1.133891  |
| 52 | H | 0 | -9.591034  | -0.681927 | -2.229011 |
| 53 | H | 0 | -11.144773 | -0.581379 | -1.380499 |
| 54 | H | 0 | -9.926232  | 0.678901  | -1.151312 |
| 55 | H | 0 | -10.865229 | -2.850065 | -0.429325 |
| 56 | H | 0 | -9.332181  | -3.056357 | -1.281161 |
| 57 | H | 0 | -9.422617  | -3.327826 | 0.469783  |
| 58 | C | 0 | 9.483081   | -1.218948 | 0.113186  |
| 59 | C | 0 | 9.735187   | -1.865939 | 1.496049  |
| 60 | C | 0 | 9.877491   | -2.219551 | -0.999142 |
| 61 | C | 0 | 10.390958  | 0.019082  | -0.010132 |
| 62 | H | 0 | 9.471771   | -1.176559 | 2.304760  |
| 63 | H | 0 | 9.148300   | -2.779060 | 1.631881  |
| 64 | H | 0 | 10.792881  | -2.130630 | 1.605747  |
| 65 | H | 0 | 9.716301   | -1.785638 | -1.991275 |
| 66 | H | 0 | 10.936574  | -2.487300 | -0.912821 |
| 67 | H | 0 | 9.295294   | -3.143808 | -0.940900 |
| 68 | H | 0 | 11.438677  | -0.280433 | 0.094187  |
| 69 | H | 0 | 10.283797  | 0.508253  | -0.983784 |
| 70 | H | 0 | 10.180459  | 0.758259  | 0.769674  |
| 71 | H | 0 | 0.386327   | -0.369831 | -1.448330 |
| 72 | H | 0 | -0.374954  | -0.382235 | 1.433564  |

**Table S4** Geometrical coordinates of the optimized **1,1'-PhCN-4,4'-BBT** by DFT at the B3LYP/6-31G(d,p) level.<sup>2</sup>

Cartesian coordinates:

| Center Number | Atomic Number | Atomic Type | Coordinates (Angstroms) |           |           |
|---------------|---------------|-------------|-------------------------|-----------|-----------|
|               |               |             | X                       | Y         | Z         |
| 1             | C             | 0           | -0.249146               | 1.611493  | 0.866384  |
| 2             | C             | 0           | 0.120699                | 3.016993  | 0.901592  |
| 3             | C             | 0           | 0.865542                | 3.510639  | 2.017186  |
| 4             | C             | 0           | 1.236605                | 2.647208  | 3.012357  |
| 5             | C             | 0           | 0.903384                | 1.260144  | 2.958729  |
| 6             | C             | 0           | 0.179881                | 0.721690  | 1.920006  |
| 7             | C             | 0           | -0.395896               | 3.738311  | -0.183192 |
| 8             | H             | 0           | 1.108075                | 4.564956  | 2.083962  |
| 9             | H             | 0           | 1.795246                | 3.017025  | 3.866865  |
| 10            | H             | 0           | 1.237068                | 0.607500  | 3.759591  |
| 11            | C             | 0           | -0.179881               | -0.721690 | 1.920006  |
| 12            | C             | 0           | 0.249146                | -1.611493 | 0.866384  |
| 13            | C             | 0           | -0.903384               | -1.260144 | 2.958729  |
| 14            | C             | 0           | -0.120699               | -3.016993 | 0.901592  |
| 15            | C             | 0           | -1.236605               | -2.647208 | 3.012357  |
| 16            | H             | 0           | -1.237068               | -0.607500 | 3.759591  |
| 17            | C             | 0           | -0.865542               | -3.510639 | 2.017186  |
| 18            | C             | 0           | 0.395896                | -3.738311 | -0.183192 |
| 19            | H             | 0           | -1.795246               | -3.017025 | 3.866865  |
| 20            | H             | 0           | -1.108075               | -4.564956 | 2.083962  |
| 21            | C             | 0           | -0.236755               | 5.152114  | -0.530686 |
| 22            | C             | 0           | -1.304628               | 5.890395  | -1.080503 |
| 23            | C             | 0           | 0.997236                | 5.809469  | -0.347514 |
| 24            | C             | 0           | -1.153412               | 7.225749  | -1.426795 |
| 25            | H             | 0           | -2.269605               | 5.412318  | -1.215891 |
| 26            | C             | 0           | 1.153170                | 7.148693  | -0.679028 |
| 27            | H             | 0           | 1.847973                | 5.252397  | 0.027988  |
| 28            | C             | 0           | 0.077847                | 7.871746  | -1.222424 |
| 29            | H             | 0           | -1.987123               | 7.780460  | -1.843623 |
| 30            | H             | 0           | 2.110349                | 7.638774  | -0.536387 |
| 31            | C             | 0           | 0.236755                | -5.152114 | -0.530686 |
| 32            | C             | 0           | 1.304628                | -5.890395 | -1.080503 |
| 33            | C             | 0           | -0.997236               | -5.809469 | -0.347514 |
| 34            | C             | 0           | 1.153412                | -7.225749 | -1.426795 |

|    |   |   |           |            |           |
|----|---|---|-----------|------------|-----------|
| 35 | H | 0 | 2.269605  | -5.412318  | -1.215891 |
| 36 | C | 0 | -1.153170 | -7.148693  | -0.679028 |
| 37 | H | 0 | -1.847973 | -5.252397  | 0.027988  |
| 38 | C | 0 | -0.077847 | -7.871746  | -1.222424 |
| 39 | H | 0 | 1.987123  | -7.780460  | -1.843623 |
| 40 | H | 0 | -2.110349 | -7.638774  | -0.536387 |
| 41 | C | 0 | -0.236755 | -9.252526  | -1.568717 |
| 42 | N | 0 | -0.366177 | -10.374434 | -1.849540 |
| 43 | C | 0 | 0.236755  | 9.252526   | -1.568717 |
| 44 | N | 0 | 0.366177  | 10.374434  | -1.849540 |
| 45 | S | 0 | -1.338062 | 2.688549   | -1.198553 |
| 46 | S | 0 | 1.338062  | -2.688549  | -1.198553 |
| 47 | C | 0 | 1.050890  | -1.310846  | -0.224295 |
| 48 | C | 0 | -1.050890 | 1.310846   | -0.224295 |
| 49 | H | 0 | -1.470469 | 0.354420   | -0.497486 |
| 50 | H | 0 | 1.470469  | -0.354420  | -0.497486 |

Ref. 2 M. J. Frisch , G. W. Trucks , H. B. Schlegel , G. E. Scuseria , M. A. Robb , J. R. Cheeseman , G. Scalmani , V. Barone , G. A. Petersson , H. Nakatsuji , X. Li , M. Caricato , A. V. Marenich , J. Bloino , B. G. Janesko , R. Gomperts , B. Mennucci , H. P. Hratchian , J. V. Ortiz , A. F. Izmaylov , J. L. Sonnenberg , D. Williams-Young , F. Ding , F. Lipparini , F. Egidi , J. Goings , B. Peng , A. Petrone , T. Henderson , D. Ranasinghe , V. G. Zakrzewski , J. Gao , N. Rega , G. Zheng , W. Liang , M. Hada , M. Ehara , K. Toyota , R. Fukuda , J. Hasegawa , M. Ishida , T. Nakajima , Y. Honda , O. Kitao , H. Nakai , T. Vreven , K. Throssell , J. A. Montgomery, Jr. , J. E. Peralta , F. Ogliaro , M. J. Bearpark , J. J. Heyd , E. N. Brothers , K. N. Kudin , V. N. Staroverov , T. A. Keith , R. Kobayashi , J. Normand , K. Raghavachari , A. P. Rendell , J. C. Burant , S. S. Iyengar , J. Tomasi , M. Cossi , J. M. Millam , M. Klene , C. Adamo , R. Cammi , J. W. Ochterski , R. L. Martin , K. Morokuma , O. Farkas , J. B. Foresman and D. J. Fox , *Gaussian 16, Revision B.01* , Gaussian, Inc., Wallingford CT, 2016.
